# Supplementary material
Source: HighWire-hosted journal article supplement (https://erj.ersjournals.com/content/49/5/1602245)
Supplement: inline-supplementary-material-1 [file inline-supplementary-material-1.pdf]

## APPENDIX A

*Table A1: Baseline characteristics of the cohort of 31,123 patients who added tiotropium to a LABA or vice-versa (combination) and their propensity score and prior ICS-matched 31,123 users of a LABA or tiotropium who did not add (monotherapy), used for the analysis of the stroke outcome (primary objective)*

|                                                                  | Combination  | Monotherapy  |
|------------------------------------------------------------------|--------------|--------------|
| <b>Number of patients</b>                                        | 31,123       | 31,123       |
| <b>Age at cohort entry, mean (sd)</b>                            | 71.9 (8.5)   | 72.2 (8.6)   |
| <b>Female sex, n (%)</b>                                         | 14347 (46.1) | 14596 (46.9) |
| <b>Year of cohort entry, n (%)</b>                               |              |              |
| Before 2007                                                      | 7285 (23.4)  | 7249 (23.3)  |
| 2007-2009                                                        | 11063 (35.5) | 11046 (35.5) |
| 2010-2013                                                        | 12775 (41)   | 12828 (41.2) |
| <b>Time since monotherapy initiation, years, mean(sd)</b>        | 2.2 (2.0)    | 2.2 (2.1)    |
| <b>Smoker, n (%)</b>                                             | 28856 (92.7) | 27876 (89.6) |
| <b>Obesity Status, n (%)</b>                                     |              |              |
| Obese                                                            | 8032 (25.8)  | 8362 (26.9)  |
| Non-Obese                                                        | 21960 (70.6) | 21749 (69.9) |
| Missing data                                                     | 1131 (3.6)   | 1012 (3.3)   |
| <b>Alcohol Abuse, n (%)</b>                                      | 393 (1.3)    | 423 (1.4)    |
| <b>COPD exacerbation in 30 days prior to cohort entry, n (%)</b> | 3072 (9.9)   | 3077 (9.9)   |
| <b>Comorbidity in year prior to cohort entry, n (%)</b>          |              |              |
| Myocardial infarction                                            | 401 (1.3)    | 403 (1.3)    |
| Arrhythmia                                                       | 982 (3.2)    | 1006 (3.2)   |
| Atherosclerosis/PVD                                              | 414 (1.3)    | 458 (1.5)    |
| Stroke                                                           | 214 (0.7)    | 207 (0.7)    |
| Heart Failure                                                    | 973 (3.1)    | 946 (3.0)    |
| Hypertension                                                     | 2817 (9.1)   | 2871 (9.2)   |
| Hyperlipidemia                                                   | 494 (1.6)    | 484 (1.6)    |
| Congenital CV abnormalities                                      | 4 (0.0)      | 10 (0.0)     |
| Diabetes                                                         | 3861 (12.4)  | 4087 (13.1)  |
| Pneumonia                                                        | 828 (2.7)    | 717 (2.3)    |
| Renal disease                                                    | 2024 (6.5)   | 2062 (6.6)   |
| Thyroid disease                                                  | 2840 (9.1)   | 2907 (9.3)   |

|                                                         | Combination  | Monotherapy  |
|---------------------------------------------------------|--------------|--------------|
| <b>Medications in year prior to cohort entry, n (%)</b> |              |              |
| <b>Cardiovascular drugs</b>                             |              |              |
| ACE inhibitors                                          | 9236 (29.7)  | 9050 (29.1)  |
| Angiotensin receptor blockers                           | 3706 (11.9)  | 3978 (12.8)  |
| Beta-blockers                                           | 4000 (12.9)  | 4045 (13.0)  |
| Thiazide diuretics                                      | 5705 (18.3)  | 5737 (18.4)  |
| Loop diuretics                                          | 8113 (26.1)  | 7827 (25.1)  |
| Antiarrhythmics                                         | 1790 (5.8)   | 1825 (5.9)   |
| Digoxin (digitalis)                                     | 1687 (5.4)   | 1610 (5.2)   |
| Nitrates                                                | 3088 (9.9)   | 3140 (10.1)  |
| Non-aspirin antiplatelets                               | 2434 (7.8)   | 2432 (7.8)   |
| Statins                                                 | 13398 (43.0) | 13466 (43.3) |
| <b>Respiratory drugs</b>                                |              |              |
| Short-acting beta-agonists                              | 28648 (92.0) | 28192 (90.6) |
| Ipratropium bromide                                     | 9862 (31.7)  | 12897 (41.4) |
| Inhaled corticosteroids                                 | 26832 (86.2) | 26832 (86.2) |
| Oral corticosteroids                                    | 15170 (48.7) | 14623 (47.0) |
| Methylxanthines                                         | 1724 (5.5)   | 1482 (4.8)   |
| <b>Drugs prolonging QT interval</b>                     |              |              |
| Macrolides                                              | 8560 (27.5)  | 8403 (27.0)  |
| Antidepressants                                         | 6928 (22.3)  | 6843 (22.0)  |
| Antipsychotics                                          | 416 (1.3)    | 424 (1.4)    |
| Others                                                  | 29792 (95.7) | 29481 (94.7) |
| <b>Other medications</b>                                |              |              |
| Insulin                                                 | 790 (2.5)    | 857 (2.8)    |
| Aspirin                                                 | 10627 (34.1) | 10749 (34.5) |
| NSAIDs                                                  | 5427 (17.4)  | 5515 (17.7)  |
| Acetaminophen                                           | 15478 (49.7) | 15514 (49.8) |
| Opioids                                                 | 13613 (43.7) | 13639 (43.8) |

*Table A2: Baseline characteristics of the cohort of 31,174 patients who added tiotropium to a LABA or vice-versa (combination) and their propensity score and prior ICS-matched 31,174 users of a LABA or tiotropium who did not add (monotherapy), used for the analysis of the heart failure outcome (primary objective)*

|                                                                  | <b>Combination</b> | <b>Monotherapy</b> |
|------------------------------------------------------------------|--------------------|--------------------|
| <b>Number of patients</b>                                        | 31,174             | 31,174             |
| <b>Age at cohort entry, mean (sd)</b>                            | 72.0 (8.5)         | 72.3 (8.6)         |
| <b>Female sex, n (%)</b>                                         | 14367 (46.1)       | 14583 (46.8)       |
| <b>Year of cohort entry, n (%)</b>                               |                    |                    |
| Before 2007                                                      | 7286 (23.4)        | 7258 (23.3)        |
| 2007-2009                                                        | 11085 (35.6)       | 11050 (35.4)       |
| 2010-2013                                                        | 12803 (41.1)       | 12866 (41.3)       |
| <b>Time since monotherapy initiation, years, mean(sd)</b>        | 2.3 (2.0)          | 2.2 (2.1)          |
| <b>Smoker, n (%)</b>                                             | 28907 (92.7)       | 27959 (89.7)       |
| <b>Obesity Status, n (%)</b>                                     |                    |                    |
| Obese                                                            | 8049 (25.8)        | 8438 (27.1)        |
| Non-Obese                                                        | 21994 (70.6)       | 21737 (69.7)       |
| Missing data                                                     | 1131 (3.6)         | 999 (3.2)          |
| <b>Alcohol Abuse, n (%)</b>                                      | 393 (1.3)          | 404 (1.3)          |
| <b>COPD exacerbation in 30 days prior to cohort entry, n (%)</b> | 3080 (9.9)         | 3048 (9.8)         |
| <b>Comorbidity in year prior to cohort entry, n (%)</b>          |                    |                    |
| Myocardial infarction                                            | 396 (1.3)          | 398 (1.3)          |
| Arrhythmia                                                       | 983 (3.2)          | 1063 (3.4)         |
| Atherosclerosis/PVD                                              | 413 (1.3)          | 450 (1.4)          |
| Stroke                                                           | 212 (0.7)          | 207 (0.7)          |
| Heart Failure                                                    | 977 (3.1)          | 952 (3.1)          |
| Hypertension                                                     | 2815 (9.0)         | 2797 (9.0)         |
| Hyperlipidemia                                                   | 495 (1.6)          | 505 (1.6)          |
| Congenital CV abnormalities                                      | 4 (0.0)            | 10 (0.0)           |
| Diabetes                                                         | 3864 (12.4)        | 4087 (13.1)        |
| Pneumonia                                                        | 829 (2.7)          | 685 (2.2)          |
| Renal disease                                                    | 2031 (6.5)         | 2078 (6.7)         |
| Thyroid disease                                                  | 2849 (9.1)         | 2866 (9.2)         |

|                                                         | Combination  | Monotherapy  |
|---------------------------------------------------------|--------------|--------------|
| <b>Medications in year prior to cohort entry, n (%)</b> |              |              |
| <b>Cardiovascular drugs</b>                             |              |              |
| ACE inhibitors                                          | 9250 (29.7)  | 9222 (29.6)  |
| Angiotensin receptor blockers                           | 3714 (11.9)  | 3943 (12.6)  |
| Beta-blockers                                           | 3999 (12.8)  | 4021 (12.9)  |
| Thiazide diuretics                                      | 5713 (18.3)  | 5813 (18.6)  |
| Loop diuretics                                          | 8129 (26.1)  | 7894 (25.3)  |
| Antiarrhythmics                                         | 1790 (5.7)   | 1820 (5.8)   |
| Digoxin (digitalis)                                     | 1695 (5.4)   | 1694 (5.4)   |
| Nitrates                                                | 3098 (9.9)   | 3156 (10.1)  |
| Non-aspirin antiplatelets                               | 2442 (7.8)   | 2378 (7.6)   |
| Statins                                                 | 13415 (43.0) | 13542 (43.4) |
| <b>Respiratory drugs</b>                                |              |              |
| Short-acting beta-agonists                              | 28702 (92.1) | 28183 (90.4) |
| Ipratropium bromide                                     | 9879 (31.7)  | 12902 (41.4) |
| Inhaled corticosteroids                                 | 26883 (86.2) | 26883 (86.2) |
| Oral corticosteroids                                    | 15212 (48.8) | 14450 (46.4) |
| Methylxanthines                                         | 1730 (5.5)   | 1483 (4.8)   |
| <b>Drugs prolonging QT interval</b>                     |              |              |
| Macrolides                                              | 8577 (27.5)  | 8352 (26.8)  |
| Antidepressants                                         | 6950 (22.3)  | 6837 (21.9)  |
| Antipsychotics                                          | 416 (1.3)    | 431 (1.4)    |
| Others                                                  | 29844 (95.7) | 29469 (94.5) |
| <b>Other medications</b>                                |              |              |
| Insulin                                                 | 788 (2.5)    | 847 (2.7)    |
| Aspirin                                                 | 10642 (34.1) | 10797 (34.6) |
| NSAIDs                                                  | 5442 (17.5)  | 5628 (18.1)  |
| Acetaminophen                                           | 15508 (49.7) | 15714 (50.4) |
| Opioids                                                 | 13645 (43.8) | 13788 (44.2) |
